# Supplementary material
Source: PubMed Central journal article supplement (PMC3028826)
Supplement: supp_79_2_812__1.pdf [file supp_79_2_812__1.pdf]

TABLE S1: Primers used for RT-PCR in this Study

| Gene                   | Primer Name | Sequence                  |
|------------------------|-------------|---------------------------|
| <i>recA</i> (SPy_2116) | CK040       | ATTGATTGATTCTGGTGCGG      |
|                        | CK041       | ATTTACGCATGGCCTGACTC      |
| <i>lctO</i> (SPy_0414) | CK070       | ACTGGCCAATGAACAAGGAG      |
|                        | CK071       | TTCTGGCAGGTCAGTTGTTG      |
| <i>ackA</i> (SPy_0109) | CK509       | TCACTAGAAATGCCTGACACCCCAC |
|                        | CK510       | AGCTGGTCCTATGATGGGAACACG  |
| <i>malM</i> (SPy_1292) | CK503       | TGTGGGGAAATCCAACCTAC      |
|                        | CK504       | ATCACCAGCAGGAATTTCCC      |
| <i>xpt</i> (SPy_1136)  | CK523       | AGCTTCAGGTATTGCACCAGCC    |
|                        | CK524       | TAGACACCGTGCTCGTCACTTG    |
| <i>dexS</i> (SPy_2096) | CK507       | CTCGTGACAAATGGATGGAAGCCG  |
|                        | CK508       | CTGCGAGACTTATTCCATGCCTGG  |
| SPy_1507               | CK497       | GTTACCACCGATTGGGCACCATTC  |
|                        | CK498       | CGTCCTCAAATGCCATGCG       |
| <i>arcA</i> (SPy_1543) | CK462       | ATGCCAAAATCTTCCCACGGAATC  |
|                        | CK463       | GAGCATAAGGAACTCTTCCAGTTGC |
| <i>speB</i> (SPy_2039) | JL17        | GTCGGTAAAGTAGGCGGACA      |
|                        | JL18        | GCCACCAGTACCAAGAGC        |
